# Supplementary material
Source: Springer Nature journal article supplement (https://www.springermedizin.de/resource/supplementary/12943_2007_278_MOESM7_ESM.pdf/9553840)
Supplement: MOESM7 [file 9553840]

**Table 3. Performance of top four markers in samples based on gender, race/ethnicity and stage.**

|                                       | Median PMR |                     | p-value <sup>a</sup> |
|---------------------------------------|------------|---------------------|----------------------|
|                                       | T          | Adj NTL             |                      |
| <b>GENDER</b>                         |            |                     |                      |
| <b>Male</b>                           | (n=28)     | (n=19)              |                      |
| CDKN2A EX2                            | 199.44     | 51.88               | 5.0E-06              |
| CDX2                                  | 28.40      | 4.78                | 2.0E-05              |
| HOXA1                                 | 139.51     | 5.06                | 4.6E-05              |
| OPCML                                 | 76.62      | 11.27               | 1.6E-06              |
| <b>Female</b>                         | (n=14)     | (n=10)              |                      |
| CDKN2A EX2                            | 189.16     | 38.64               | 1.3E-04              |
| CDX2                                  | 114.71     | 3.15                | 4.0E-05              |
| HOXA1                                 | 188.13     | 1.34                | 3.1E-06              |
| OPCML                                 | 154.32     | 5.36                | 3.1E-06              |
| <b>RACE</b>                           |            |                     |                      |
| <b>White Hispanic</b>                 | (n=14)     | (n=10)              |                      |
| CDKN2A EX2                            | 165.47     | 37.52               | 6.0E-04              |
| CDX2                                  | 39.49      | 1.98                | 2.0E-04              |
| HOXA1                                 | 52.98      | 1.75                | 7.7E-03              |
| OPCML                                 | 142.56     | 8.17                | 6.0E-04              |
| <b>White Non-Hispanic</b>             | (n=14)     | (n=10)              |                      |
| CDKN2A EX2                            | 314.35     | 38.00               | 5.0E-04              |
| CDX2                                  | 110.73     | 4.78                | 1.1E-03              |
| HOXA1                                 | 231.66     | 4.90                | 4.6E-05              |
| OPCML                                 | 179.79     | 6.54                | 4.7E-05              |
| <b>Black</b>                          | (n=11)     | (n=7)               |                      |
| CDKN2A EX2                            | 194.91     | 51.88               | 1.5E-02              |
| CDX2                                  | 129.96     | 9.11                | 2.4E-02              |
| HOXA1                                 | 128.52     | 6.16                | 1.1E-02              |
| OPCML                                 | 91.15      | 14.29               | 5.0E-03              |
| <b>Asian</b>                          | (n=6)      | (n=4)               |                      |
| CDKN2A EX2                            | 145.56     | 39.81               | <b>1.1E-01</b>       |
| CDX2                                  | 24.28      | 1.78                | 2.3E-02              |
| HOXA1                                 | 117.49     | 0.99                | 1.4E-02              |
| OPCML                                 | 88.81      | 4.67                | 1.4E-02              |
| <b>STAGE</b>                          |            |                     |                      |
| <b>Stage IA</b>                       | (n=12)     | (n=12) <sup>b</sup> |                      |
| CDKN2A EX2                            | 182.57     | 47.28               | 4.9E-04              |
| CDX2                                  | 99.71      | 3.15                | 4.9E-04              |
| HOXA1                                 | 143.06     | 3.25                | 1.0E-03              |
| OPCML                                 | 189.43     | 7.65                | 4.9E-04              |
| <b>Stage IB</b>                       | (n=6)      | (n=6) <sup>b</sup>  |                      |
| CDKN2A EX2                            | 190.67     | 61.00               | 3.1E-02              |
| CDX2                                  | 20.62      | 13.36               | <b>3.1E-01</b>       |
| HOXA1                                 | 78.98      | 2.15                | 6.3E-02              |
| OPCML                                 | 76.62      | 15.16               | 6.3E-02              |
| <b>Stage IIA/IIB/IIIA<sup>c</sup></b> | (n=10)     | (n=10) <sup>b</sup> |                      |
| CDKN2A EX2                            | 208.05     | 39.81               | 1.0E-02              |
| CDX2                                  | 83.22      | 1.78                | 2.0E-03              |
| HOXA1                                 | 180.18     | 6.16                | 2.0E-03              |
| OPCML                                 | 178.54     | 8.25                | 2.0E-03              |

<sup>a</sup> p-value calculated by mann-whitney for gender and race and wilcoxon signed rank test for stage, in which paired adjacent non-tumor samples were used.

<sup>b</sup> For stage comparisons, paired adjacent samples from same patients as tumors were used.

<sup>c</sup> Only one paired sample was available for stages IIA and IIIA and none for IIB, hence IIA/IIB/IIIA were pooled.
